# Supplementary material
Source: HighWire-hosted journal article supplement (https://dmd.aspetjournals.org/highwire/filestream/76500/field_highwire_adjunct_files/5/DMD274_Supp_fig6.pdf)
Supplement: DMD274_Supp_fig6.pdf [file DMD274_Supp_fig6.pdf]

Tryptophan-75 is a low energy channel gating residue that facilitates substrate egress/access in cytochrome P450 2D6. McCarty, Ratliff, K. Furge, L. Furge. *Drug Metab Dispos*, DMD-AR-2020-000274.

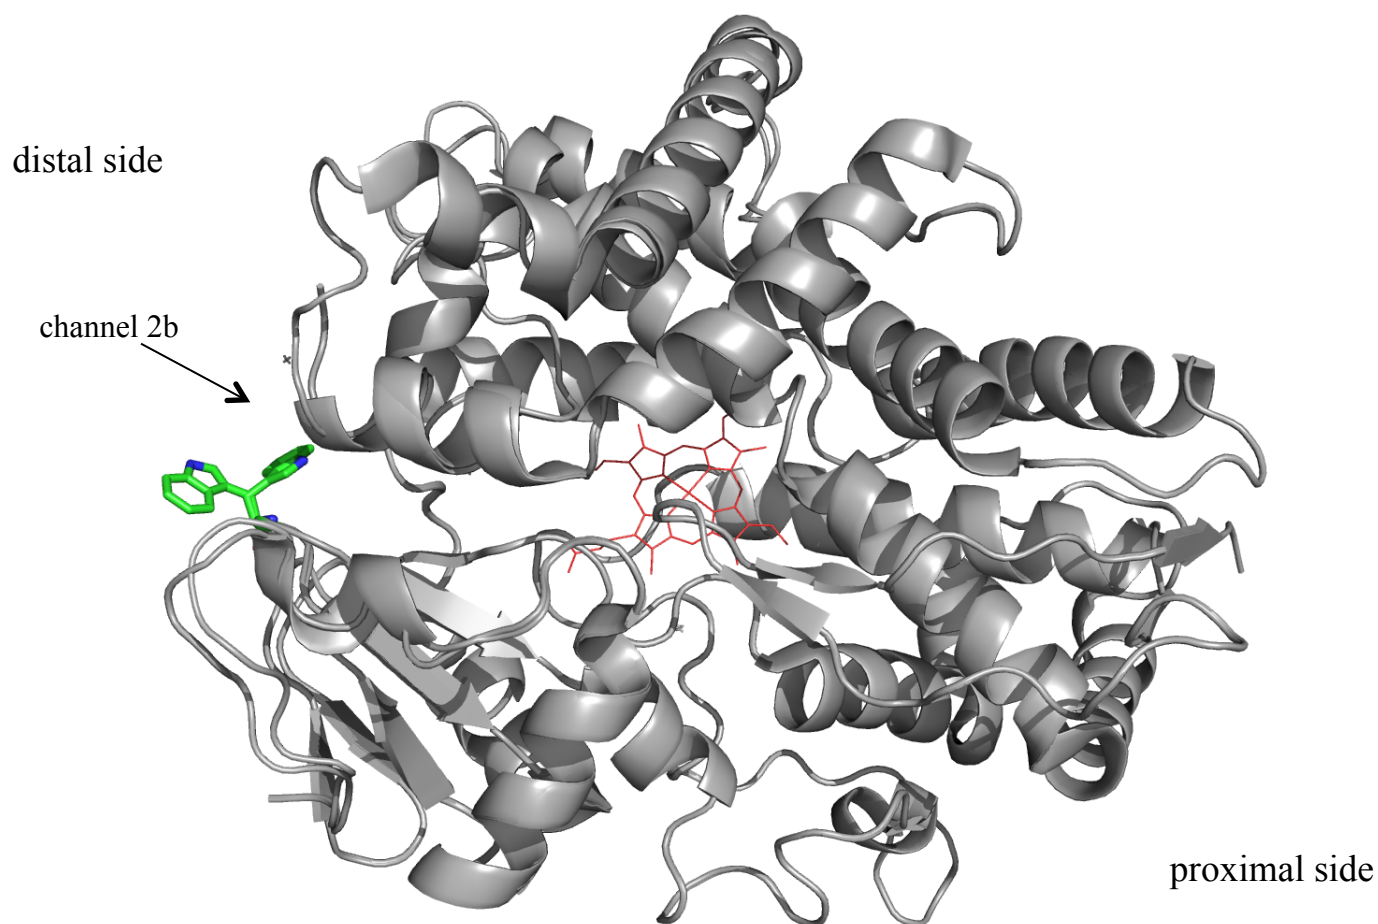

**Supp Figure S6. Conformations of Trp75 in Chain A and B of Crystal Structure 3QM4 of CYP2D6.**

Chain A and B (both colored in gray) from the 3QM4 crystal structure were aligned using PyMol. Trp75 from each structure is shown in the overlay as sticks colored by element. Heme is shown in red.
